# Supplementary material
Source: Copernicus journal article supplement (doi:10.5194/egusphere-2026-1941)
Supplement: Supplementary file 1 [file egusphere-2026-1941-supplement.pdf]

1 **Supplement**

2 **S1. Longuet-Higgins Radiation Stress Coupling:**

3 The concept of radiation stress, introduced by Longuet-Higgins and Stewart (1962), quantifies the transfer of momentum by  
 4 surface gravity waves. This momentum transfer is particularly important for affecting coastal water levels and nearshore  
 5 currents.

6  
 7 Due to wave motion, the radiation stress terms which induce wave setup and drive nearshore currents, are added to the Navier–  
 8 Stokes momentum equation of (Longuet-Higgins and Stewart, 1962, 1964; Roland et al., 2012).

9 
$$R_s = (R_{sx}, R_{sy}) \tag{S1}$$

10 
$$R_{sx} = -\frac{1}{\rho_0 H} \frac{\partial S_{xx}}{\partial x} - \frac{1}{\rho_0 H} \frac{\partial S_{xy}}{\partial y} \tag{S2}$$

11 
$$R_{sy} = -\frac{1}{\rho_0 H} \frac{\partial S_{yy}}{\partial y} - \frac{1}{\rho_0 H} \frac{\partial S_{xy}}{\partial x} \tag{S3}$$

12  
 13 where:

14  $\rho_0$  is the water density,  $\eta$  is the surface elevation,  $h$  is the resting depth of the ocean,  $H = h + \eta$  is the total water depth,  
 15  $S_{xx}, S_{xy}, S_{yy}$  are the components of the radiation stress tensor, the stress is uniform in the vertical dimension.

16 In the Longuet-Higgins Coupling, the ocean component (e.g. SCHISM) provides current velocity and water level to the wave  
 17 component (e.g. WW3), and WW3 provides the radiation stress to SCHISM (Fig. S1).

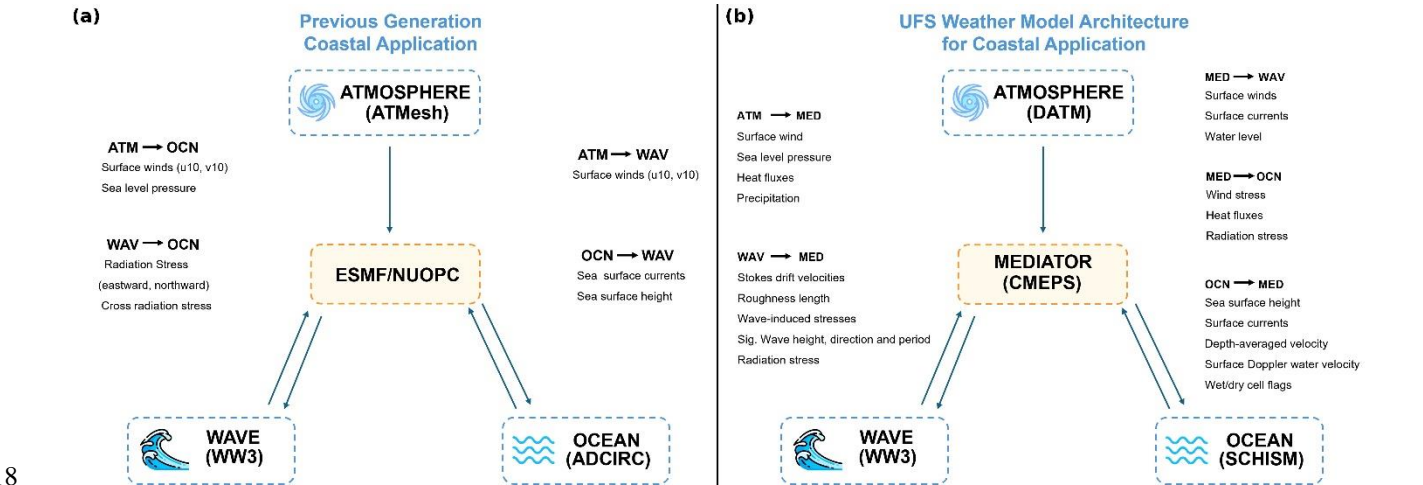

18 Figure S1. (a) Longuet-Higgins Ocean Wave coupling diagram in UFS-Coastal, (b) 3D vortex Ocean Wave coupling  
 19 diagram in UFS-Coastal  
 20

21 **S2. 3D Vortex Coupling Formulation**

22 The vortex formulation explicitly represents the 3D transfer of wave momentum into sub-surface currents. The primary  
 23 equation is also adding the vortex term to the modified Navier–Stokes momentum equation (Uchiyama et al., 2010; Bennis et  
 24 al., 2011; Kumar et al., 2012).

25 Here we have the concept  $\vec{U} = \vec{U}_l - \vec{U}_s$

26 Where  $\vec{U}$  is the quasi-Eulerian velocity,  $(u, v, w)$  are its components in  $x, y, z$  directions;  $\vec{U}_l$  is the mean Lagrangian velocity;  
 27 and  $\vec{U}_s$  is the wave-introduced stoke drift,  $(u_s, v_s, w_s)$  are the  $U_s$  components in  $x, y, z$  directions.

28 
$$(u_s, v_s) = \sigma k(\cos\theta, \sin\theta)E \frac{\cosh(2kz+s2kh)}{\sinh^2(kD)} \quad (s4)$$

29  
 30 Where  $D$  is the water depth equal to the bathymetry adding the surface elevation  $D = h + \zeta$ ,  $k(\cos\theta, \sin\theta)$  is the wave number  
 31 vector,  $\sigma$  is the intrinsic radiation frequency,  $E$  is the spectral density of the surface wave.

32  
 33  $w_s$  could be calculated from the continuity equation:

34 
$$\frac{\partial u_s}{\partial x} + \frac{\partial v_s}{\partial y} + \frac{\partial w_s}{\partial z} = 0 \quad (s5)$$

35 To enable the 3D vortex coupling, three major terms are added to the right side of the primitive ocean momentum equation:  
 36  $-\vec{\nabla}J$ ,  $-w_s \frac{\partial \vec{U}}{\partial z}$  and  $\vec{F}_{vortex}$ . Other terms such as mixing  $F_m$ , wave breaking, wave turbulence  $F_d$ , bottom frictions  $F_b$  are optional  
 37 to use to improve the simulation results (Bennis et al., 2011).

38  
 39  $F_{vortex}$  is the vortex-force term,  $-\vec{\nabla}J$  is the wave-induced mean pressure (Bernoulli head) ( $J$  is the wave-induced mean  
 40 pressure),  $-w_s \frac{\partial \vec{U}}{\partial z}$  is the vertical Stokes-drift advection term.

41 
$$\vec{F}_{vortex} = (f + \vec{\nabla} \times \vec{U}) \times \vec{U}_s \quad (S6)$$

42 Where  $f$  is the Coriolis force coefficient.

43 The three terms separated in  $x, y$  directions become as follows:

44 
$$-\frac{\partial J}{\partial x} - w_s \frac{\partial u}{\partial z} + \left[ f + \left( \frac{\partial v}{\partial x} - \frac{\partial u}{\partial y} \right) \right] u_s \quad (s7)$$

45  
 46 
$$-\frac{\partial J}{\partial y} - w_s \frac{\partial v}{\partial z} + \left[ f + \left( \frac{\partial v}{\partial x} - \frac{\partial u}{\partial y} \right) \right] v_s \quad (s8)$$

47  
 48 These terms are computed from wave model outputs (e.g., WW3) and integrated within hydrodynamic models (e.g., SCHISM),  
 49 allowing for accurate representation of wave-induced currents, mixing, and turbulence. Uchiyama et al. (2010) provide a

50 rigorous derivation and explanation of the vortex-force formalism. The detailed variable exchanges can be found in Fig. S1b  
 51 and Table S1 &S2, the variable names are from the SCHISM and WW3 defintions.

52

53 **Table S1. Variables exported from WW3 to SCHISM in the 3D vortex coupling configuration.**

| Wave Variable | Exported name                                                                                                             | Purpose                                                   |
|---------------|---------------------------------------------------------------------------------------------------------------------------|-----------------------------------------------------------|
| Ustx          | eastward_stokes_drift_current (stokes drift)                                                                              | Calculate 2D stokes terms                                 |
| Usty          | northward_stokes_drift_current (stokes drift)                                                                             | Calculate 2D stokes terms                                 |
| Uorbx         | eastward_wave_bottom_current (near bottom orbital velocity)                                                               | For wave bottom boundary layer calculations               |
| Uorby         | northward_wave_bottom_current (near bottom orbital velocity)                                                              | For wave bottom boundary layer calculations               |
| Awb           | exported_name (near bottom excursion wave amplitude)                                                                      | For wave bottom boundary layer calculations               |
| k             | exported_name (spectrally averaged wavenumber vector)                                                                     | Calculate wave induced terms in ocean model               |
| $\theta$      | exported_name (spectrally averaged wave direction)                                                                        | Calculate wave induced terms in ocean model               |
| $\tau_{wx}$   | surface_eastward_wave_induced_stress                                                                                      | Calculate surface drag coefficients & boundary conditions |
| $\tau_{wy}$   | surface_northward_wave_induced_stress                                                                                     | Calculate surface drag coefficients & boundary conditions |
| $\tau_{bwx}$  | eastward_wave_to_bbl_stress (utbb)                                                                                        | Bottom boundary layer calculations & boundary conditions  |
| $\tau_{bwy}$  | northward_wave_to_bbl_stress (vtbb)                                                                                       | Bottom boundary layer calculations & boundary conditions  |
| Hs            | Significant wave height (WW3__OHS)                                                                                        | Calculation on BL                                         |
| TM1           | Mean wave period (WW3_T0M1)                                                                                               | Wave BBL                                                  |
| BHD           | wave-induced Bernoulli head pressure<br>WW3__BHD (Ali Abdolali checked unit: m2/s2)<br>J term According to Smith JPO 2006 | Momentum                                                  |
| TWO           | wave-ocean momentum flux WW3_TWOX<br>&WW3_TWOY                                                                            | Momentum                                                  |

|         |                                                             |                                                                                                     |
|---------|-------------------------------------------------------------|-----------------------------------------------------------------------------------------------------|
| TBB     | Momentum flux due to bottom friction<br>WW3_TBBX & WW3_TBBY | Momentum                                                                                            |
| Rollers | exported_name (dissipation term)                            | Calculate wave roller terms (Bennis et al. 2011).<br>This is one way to calculate the roller terms. |

54

55

**Table S2. Variables exported from SCHISM to WW3 in the 3D vortex coupling configuration.**

| Ocean Variable | Exported name                                                      | Purpose                                                   |
|----------------|--------------------------------------------------------------------|-----------------------------------------------------------|
| $\zeta$        | sea_surface_height_above_sea_level<br>(surface height above geoid) | Calculate WW3 terms                                       |
| usx            | surface_eastward_sea_water_velocity<br>(surface water velocity)    | Calculate WW3 terms                                       |
| usy            | surface_northward_sea_water_velocity<br>(surface water velocity)   | Calculate WW3 terms                                       |
| dav            | Depth-averaged velocity (x,y)                                      | 2D radiation stress formulation                           |
| vdx            | exported_name (surface doppler water<br>velocity)                  | Calculate WW3 terms                                       |
| vdv            | exported_name (surface doppler water<br>velocity)                  | Calculate WW3 terms                                       |
| idry_e(mask)   | exported_name=idry (wet (=0)/dry<br>(=1) flags @ cell)             | Skip dry cells (mask array, exported<br>ocean_mask field) |

56

57

**Reference:**

58

Bennis, A.-C., Ardhuin, F., and Dumas, F.: On the coupling of wave and three-dimensional circulation models: Choice of theoretical framework, practical implementation and adiabatic tests, *Ocean Modelling*, 40, 260-272, 10.1016/j.ocemod.2011.09.003, 2011.

59

60

61

Kumar, N., Voulgaris, G., Warner, J. C., and Olabarrieta, M.: Implementation of the vortex force formalism in the coupled ocean-atmosphere-wave-sediment transport (COAWST) modeling system for inner shelf and surf zone applications, *Ocean Modelling*, 47, 65-95, 10.1016/j.ocemod.2012.01.003, 2012.

62

63

64

Longuet-Higgins, M. S. and Stewart, R. W.: Radiation stress and mass transport in gravity waves, with application to 'surf beats', *Journal of Fluid Mechanics*, 13, 481-504, 10.1017/S0022112062000877, 1962.

65

66

67

Longuet-Higgins, M. S. and Stewart, R. W.: Radiation stresses in water waves; a physical discussion, with applications, *Deep Sea Research*, 11, 529-562, 1964.

68

69

70

Roland, A., Zhang, Y. J., Wang, H. V., Meng, Y., Teng, Y. C., Maderich, V., Brovchenko, I., Dutour-Sikiric, M., and Zanke, U.: A fully coupled 3D wave-current interaction model on unstructured grids, *Journal of Geophysical Research: Oceans*, 117, 10.1029/2012jc007952, 2012.

71

72

73

Uchiyama, Y., McWilliams, J. C., and Shchepetkin, A. F.: Wave-current interaction in an oceanic circulation model with a vortex-force formalism: Application to the surf zone, *Ocean Modelling*, 34, 16-35, 10.1016/j.ocemod.2010.04.002, 2010.
